# Supplementary material
Source: PubMed Central journal article supplement (PMC3086494)
Supplement: NIHMS285306-supplement-Figures.pdf [file NIHMS285306-supplement-Figures.pdf]

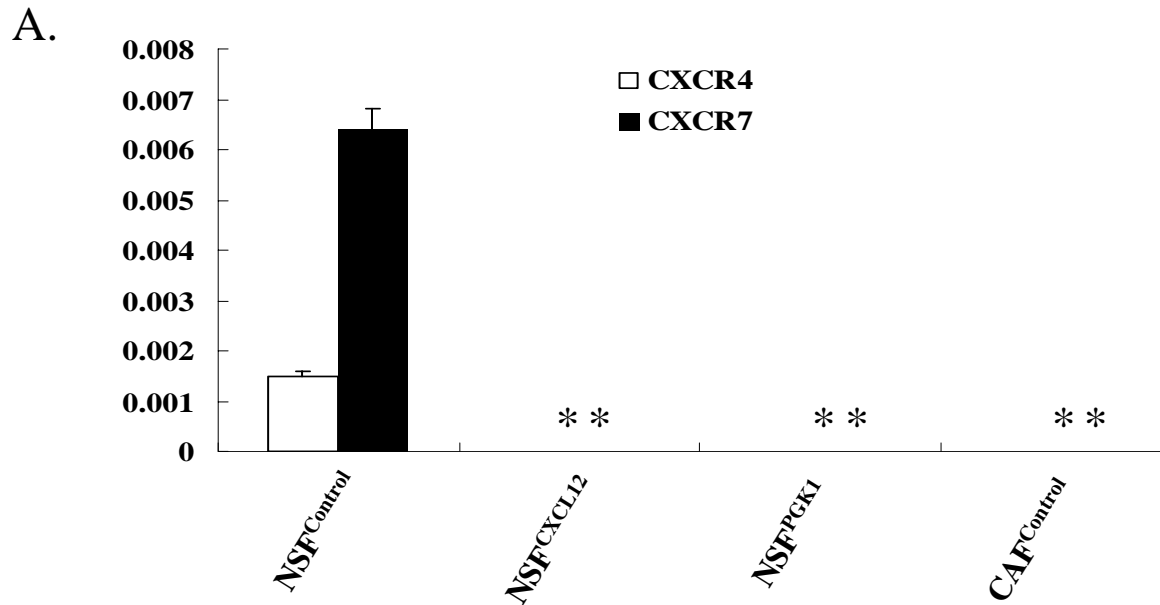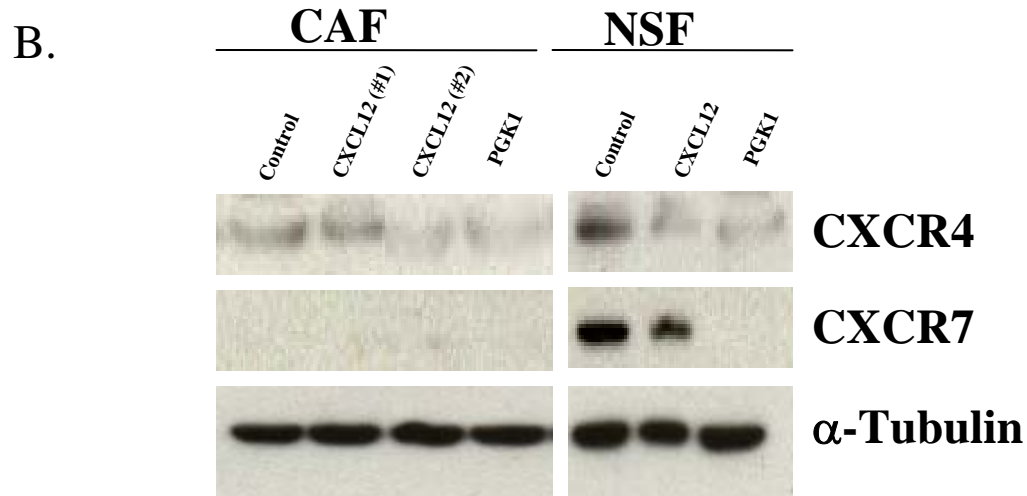

Wang *et al.*, Supplemental Figure 1.

**NSF<sup>Control</sup>**

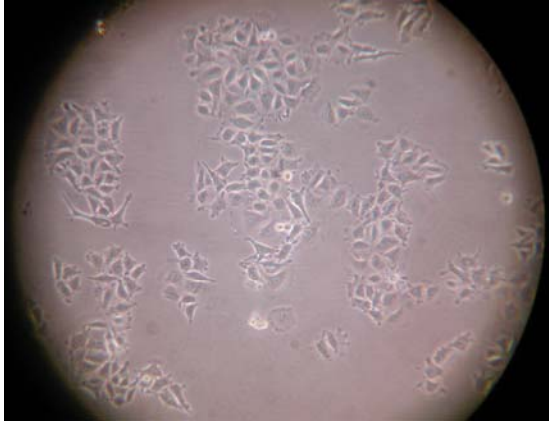

**NSF<sup>CXCL12 (L)</sup>**

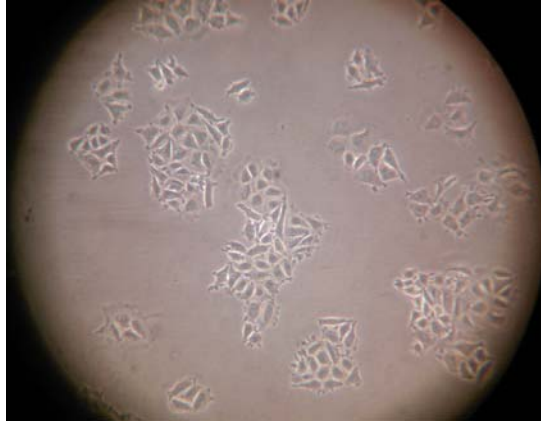

**NSF<sup>CXCL12 (H)</sup>**

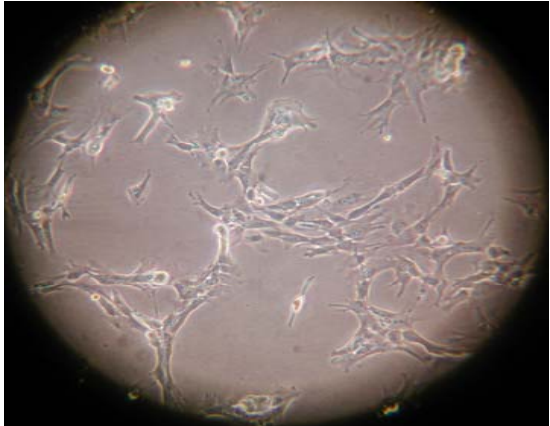

**NSF<sup>PGK1</sup>**

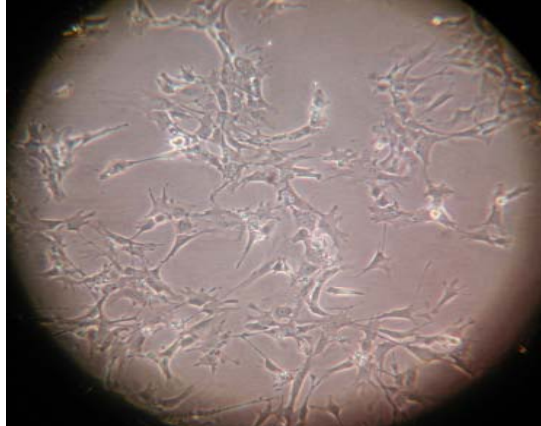

**CAF**

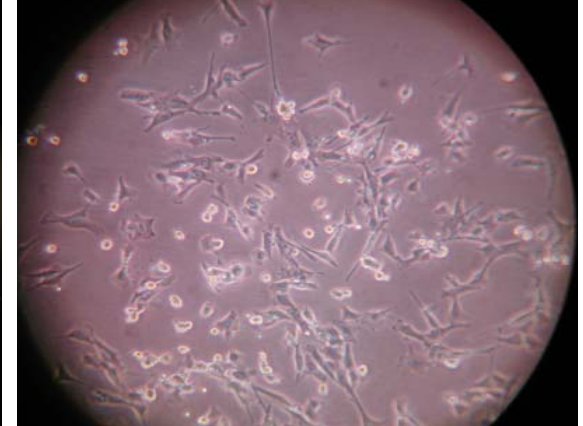

**Wang *et al.*, Supplemental Figure 2.**

A.

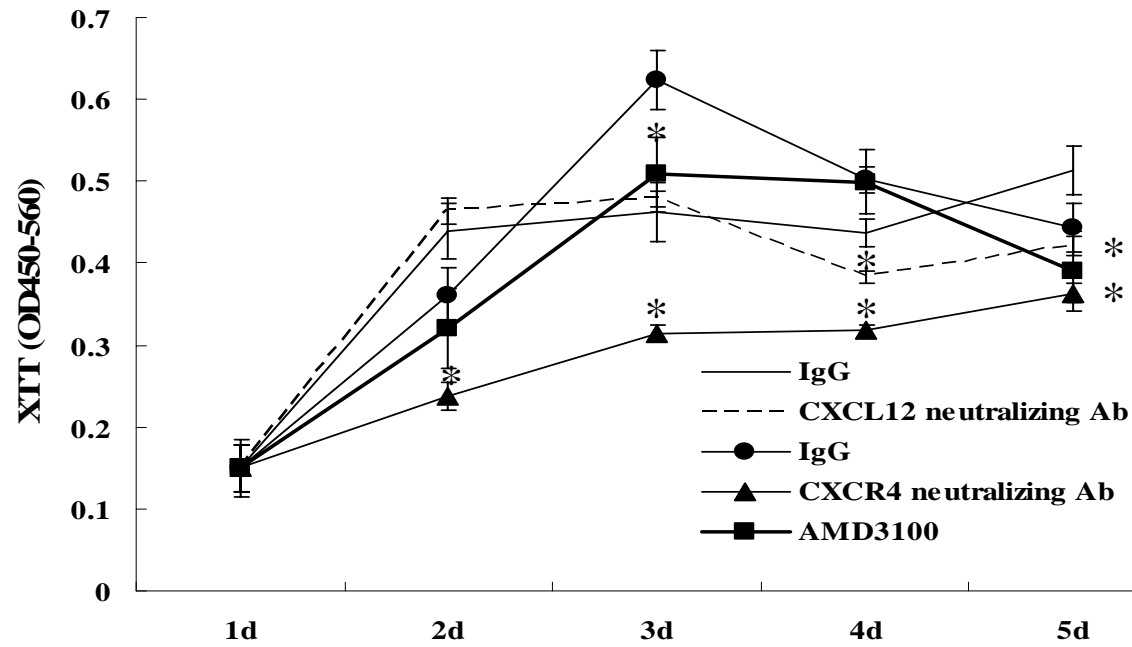

B.

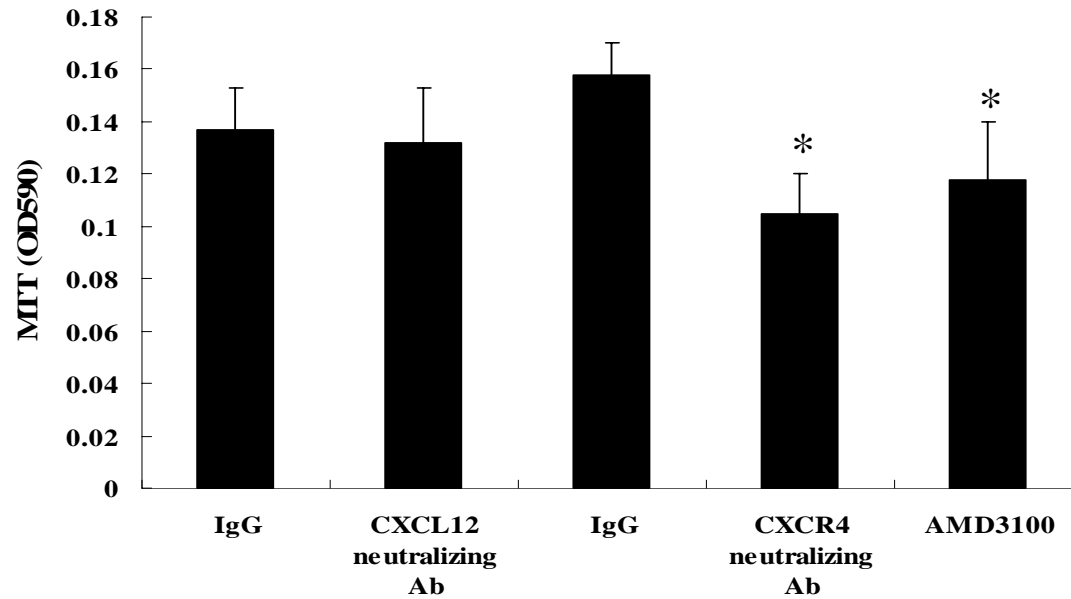

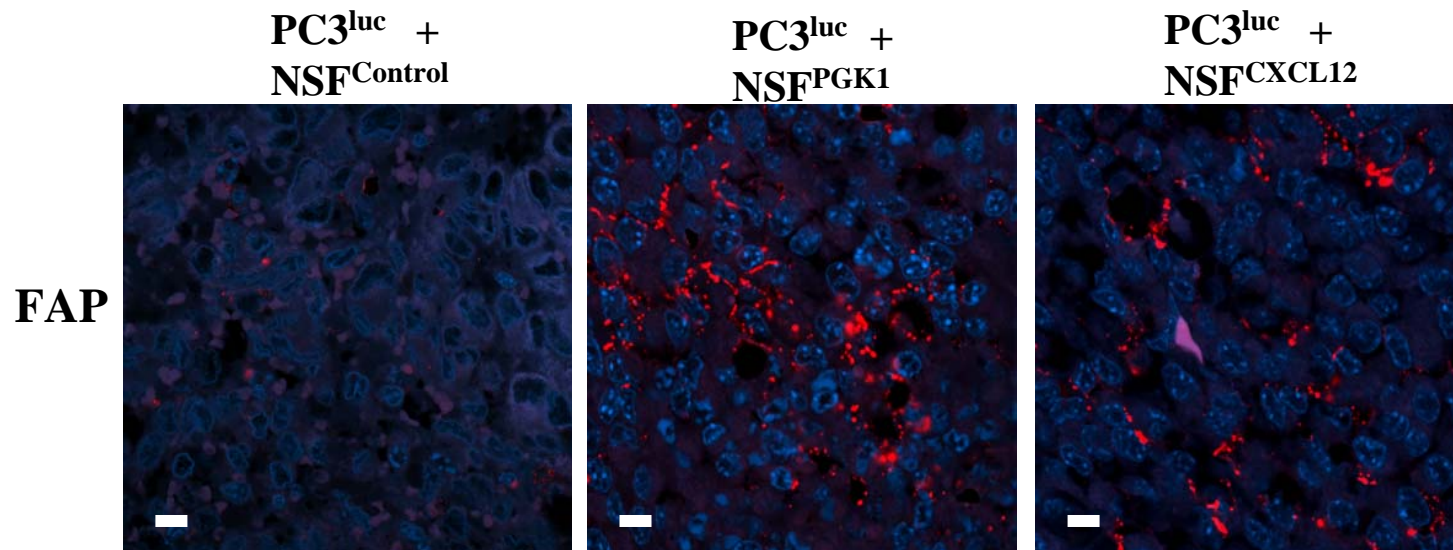

**Wang *et al.*, Supplemental Figure 4.**
