# Supplementary material
Source: PubMed Central journal article supplement (PMC3086494)
Supplement: NIHMS285306-supplement-Table_1.pdf [file NIHMS285306-supplement-Table_1.pdf]

**Table 2. Top 7 pathways enriched in common genes induced by overexpression of CXCL12 and PGK1 in NSF**

| Pathways  | Gene Symbol | Gene Title                                                           | CXCL12      | PGK1        |
|-----------|-------------|----------------------------------------------------------------------|-------------|-------------|
|           |             |                                                                      | Fold Change | Fold Change |
| Apoptosis | CADM1       | cell adhesion molecule 1                                             | 28.89       | 25.15       |
|           | BTG1        | B-cell translocation gene 1, anti-proliferative                      | 28.22       | 29.83       |
|           | NR4A2       | nuclear receptor subfamily 4, group A, member 2                      | 22.2        | 16.89       |
|           | TRPS1       | trichorhinophalangeal syndrome 1                                     | 21.25       | 14.7        |
|           | EDIL3       | EGF-like repeats and discoidin I-like domains 3                      | 21.17       | 17.39       |
|           | MAPK10      | mitogen-activated protein kinase 10                                  | 20.27       | 19.76       |
|           | ADRB2       | adrenergic, beta-2-, receptor, surface                               | 19.67       | 20.56       |
|           | ITGB8       | integrin, beta 8                                                     | 17.2        | 14.26       |
|           | POU4F1      | POU class 4 homeobox 1                                               | 16.91       | 10.93       |
|           | ABCA1       | ATP-binding cassette, sub-family A (ABC1), member 1                  | 12.95       | 7.61        |
|           | CD2         | CD2 molecule                                                         | 12.33       | 9.88        |
|           | EDAR        | ectodysplasin A receptor                                             | 11.73       | 13.88       |
|           | ERCC6       | excision repair cross-complementing group 6                          | 11.23       | 8.4         |
|           | IFNG        | interferon, gamma                                                    | 11.22       | 7.45        |
|           | NR4A3       | nuclear receptor subfamily 4, group A, member 3                      | 11.12       | 9           |
|           | TP63        | tumor protein p63                                                    | 11.08       | 11.42       |
|           | CD40        | CD40 molecule, TNF receptor superfamily member 5                     | 10.97       | 9.25        |
|           | PPP3CC      | Protein phosphatase 3, catalytic subunit, gamma isoform              | 10.72       | 12.15       |
|           | RYBP        | RING1 and YY1 binding protein                                        | 10.24       | 5.8         |
|           | COL4A3      | collagen, type IV, alpha 3 (Goodpasture antigen)                     | 9.88        | 8.43        |
|           | ACTC1       | actin, alpha, cardiac muscle 1                                       | 9.57        | 12.4        |
|           | CSNK1A1     | casein kinase 1, alpha 1                                             | 9.19        | 11.27       |
|           | EIF4G2      | eukaryotic translation initiation factor 4 gamma, 2                  | 8.8         | 7.38        |
|           | XIAP        | X-linked inhibitor of apoptosis                                      | 8.64        | 9.14        |
|           | PML         | promyelocytic leukemia                                               | 8.35        | 9.14        |
|           | HIPK3       | homeodomain interacting protein kinase 3                             | 8.21        | 9.87        |
|           | TNFRSF9     | tumor necrosis factor receptor superfamily, member 9                 | 8.11        | 6.8         |
|           | FCER1G      | Fc fragment of IgE, high affinity I, receptor for; gamma polypeptide | 7.94        | 11.52       |
|           | ADORA1      | adenosine A1 receptor                                                | 7.72        | 7.03        |
|           | PPP3R1      | protein phosphatase 3, regulatory subunit B, alpha isoform           | 7.61        | 11.94       |
|           | GAL         | galanin prepropeptide                                                | 7.55        | 8.29        |
|           | JUN         | Jun oncogene                                                         | 7.28        | 12.36       |
|           | BCL6        | B-cell CLL/lymphoma 6 (zinc finger protein 51)                       | 7.1         | 3.88        |
|           | BAX         | BCL2-associated X protein                                            | 6.39        | 7.94        |
|           | MMP9        | matrix metalloproteinase 9                                           | 6.08        | 6.6         |
|           | CASP2       | caspace 2                                                            | 6.06        | 2.78        |
|           | RTEL1       | regulator of telomere elongation helicase 1                          | 5.92        | 5.07        |
|           | VEGFA       | vascular endothelial growth factor A                                 | 5.9         | 5.82        |
|           | CUL3        | cullin 3                                                             | 5.56        | 6.5         |
|           | BRE         | brain and reproductive organ-expressed (TNFRSF1A modulator)          | 4.53        | 4.09        |
|           | ZFAND5      | zinc finger, AN1-type domain 5                                       | 4.33        | 4.02        |
|           | PPP2CA      | protein phosphatase 2, catalytic subunit, alpha isoform              | 3.89        | 4.03        |
|           | CSNK1A1     | casein kinase 1, alpha 1                                             | 3.81        | 3.26        |
|           | SIAH1       | seven in absentia homolog 1 (Drosophila)                             | 3.63        | 3.39        |
|           | CUL1        | cullin 1                                                             | 3.61        | 3.55        |
|           | PTPN6       | protein tyrosine phosphatase, non-receptor type 6                    | 3.36        | 2.25        |
|           | ACVR1       | activin A receptor, type I                                           | 3.28        | 4.68        |
|           | DYRK2       | dual-specificity tyrosine-(Y)-phosphorylation regulated kinase 2     | 2.98        | 4.91        |
|           | MAGED1      | melanoma antigen family D, 1                                         | 2.98        | 2.78        |
|           | E2F1        | E2F transcription factor 1                                           | 2.57        | 2.51        |
|           | PDCD10      | programmed cell death 10                                             | 2.52        | 2.95        |
|           | SGPL1       | sphingosine-1-phosphate lyase 1                                      | 2.43        | 2.73        |
|           | ATG5        | ATG5 autophagy related 5 homolog (S. cerevisiae)                     | 2.35        | 2.5         |
|           | EP300       | E1A binding protein p300                                             | 2.17        | 3.41        |
|           | TAX1BP1     | Tax1 (human T-cell leukemia virus type I) binding protein 1          | 2.14        | 2.48        |

|            |             |                                                                        |       |       |
|------------|-------------|------------------------------------------------------------------------|-------|-------|
| Cell Cycle | CITED2      | Cbp/p300-interacting transactivator, 2                                 | 93.8  | 75.75 |
|            | FGD1        | FYVE, RhoGEF and PH domain containing 1                                | 34.05 | 32.77 |
|            | CADM1       | cell adhesion molecule 1                                               | 28.89 | 25.15 |
|            | BTG1        | B-cell translocation gene 1, anti-proliferative                        | 28.22 | 29.83 |
|            | MUSK        | muscle, skeletal, receptor tyrosine kinase                             | 15.02 | 15.34 |
|            | UBN1        | ubiquitin 1                                                            | 14.59 | 12.74 |
|            | EGFR        | epidermal growth factor receptor                                       | 13.6  | 8.87  |
|            | RASSF2      | Ras association (RalGDS/AF-6) domain family member 2                   | 13.18 | 12.24 |
|            | ZER1        | zer-1 homolog (C. elegans)                                             | 13.02 | 9.38  |
|            | FBXL7       | F-box and leucine-rich repeat protein 7                                | 12.91 | 8.11  |
|            | UBE2L6      | ubiquitin-conjugating enzyme E2L 6                                     | 12.74 | 13.94 |
|            | HERC3       | hect domain and RLD 3                                                  | 12.09 | 6.18  |
|            | hCG_1998957 | major histocompatibility complex, class II                             | 11.93 | 15.31 |
|            | EDAR        | ectodysplasin A receptor                                               | 11.73 | 13.88 |
|            | CDC2L5      | cell division cycle 2-like 5                                           | 11.24 | 13.32 |
|            | CD40        | CD40 molecule, TNF receptor superfamily member 5                       | 10.97 | 9.25  |
|            | NHLH2       | nescient helix loop helix 2                                            | 10.93 | 12.87 |
|            | IFNA5       | interferon, alpha 5                                                    | 10.2  | 7.85  |
|            | CHFR        | checkpoint with forkhead and ring finger domains                       | 9.63  | 10.26 |
|            | CSNK1A1     | casein kinase 1, alpha 1                                               | 9.19  | 11.27 |
|            | DMBT1       | deleted in malignant brain tumors 1                                    | 9.17  | 11.55 |
|            | DDX3X       | DEAD (Asp-Glu-Ala-Asp) box polypeptide 3, X-linked                     | 9.05  | 6.54  |
|            | PTP4A3      | protein tyrosine phosphatase type IVA, member 3                        | 8.89  | 9.27  |
|            | REC8        | REC8 homolog (yeast)                                                   | 8.85  | 9.01  |
|            | EIF4G2      | eukaryotic translation initiation factor 4 gamma, 2                    | 8.8   | 7.38  |
|            | PRKY        | protein kinase, Y-linked                                               | 8.75  | 6.91  |
|            | PER1        | period homolog 1 (Drosophila)                                          | 8.67  | 7.44  |
|            | XIAP        | X-linked inhibitor of apoptosis                                        | 8.64  | 9.14  |
|            | PML         | promyelocytic leukemia                                                 | 8.35  | 9.14  |
|            | LOH11CR2A   | loss of heterozygosity, 11, chromosomal region 2, gene A               | 8.31  | 9.03  |
|            | HIST1H4G    | histone cluster 1, H4g                                                 | 8.07  | 12.14 |
|            | MYL4        | myosin, light chain 4, alkali; atrial, embryonic                       | 7.96  | 5.24  |
|            | XIST        | X (inactive)-specific transcript (non-protein coding)                  | 7.53  | 12.13 |
|            | FOXC1       | forkhead box C1                                                        | 7.5   | 6.58  |
|            | H2AFX       | H2A histone family, member X                                           | 7.18  | 5.66  |
|            | BCL6        | B-cell CLL/lymphoma 6 (zinc finger protein 51)                         | 7.1   | 3.88  |
|            | PP1G        | peptidylprolyl isomerase G (cyclophilin G)                             | 7.06  | 8.36  |
|            | UBE2L3      | ubiquitin-conjugating enzyme E2L 3                                     | 6.82  | 5.54  |
|            | BAX         | BCL2-associated X protein                                              | 6.39  | 7.94  |
|            | UBE2D4      | ubiquitin-conjugating enzyme E2D 4 (putative)                          | 6.04  | 5.37  |
|            | HIST2H2BE   | histone cluster 2, H2be                                                | 5.99  | 6.36  |
|            | DGKA        | diacylglycerol kinase, alpha 80kDa                                     | 5.98  | 6.92  |
|            | FBXW2       | F-box and WD repeat domain containing 2                                | 5.71  | 5.53  |
|            | HMGA2       | high mobility group AT-hook 2                                          | 5.62  | 7.86  |
|            | RAP1A       | RAP1A, member of RAS oncogene family                                   | 5.58  | 3.37  |
|            | CUL3        | cullin 3                                                               | 5.56  | 6.5   |
|            | BRCC3       | BRCA1/BRCA2-containing complex, subunit 3                              | 5.46  | 6.73  |
|            | JARID1A     | jumonji, AT rich interactive domain 1A                                 | 5.38  | 4.97  |
|            | UBE2Q1      | ubiquitin-conjugating enzyme E2Q family member 1                       | 5.26  | 6.82  |
|            | CBLB        | Cas-Br-M (murine) ecotropic retroviral transforming sequence b         | 5.12  | 4.09  |
|            | ARG2        | arginase, type II                                                      | 5.01  | 3.95  |
|            | DDX5        | DEAD (Asp-Glu-Ala-Asp) box polypeptide 5                               | 4.87  | 4.55  |
|            | FANCC       | Fanconi anemia, complementation group C                                | 4.76  | 3.59  |
|            | CNOT3       | CCR4-NOT transcription complex, subunit 3                              | 4.72  | 4.7   |
|            | MID2        | midline 2                                                              | 4.72  | 4.12  |
|            | SOCS6       | suppressor of cytokine signaling 6                                     | 4.7   | 4.91  |
|            | PARD6A      | par-6 partitioning defective 6 homolog alpha (C. elegans)              | 4.67  | 4.33  |
|            | RANBP9      | RAN binding protein 9                                                  | 4.65  | 3.52  |
|            | BRE         | brain and reproductive organ-expressed (TNFRSF1A modulator)            | 4.53  | 4.09  |
|            | GCAT        | glycine C-acetyltransferase (2-amino-3-ketobutyrate coenzyme A ligase) | 4.51  | 3.35  |
|            | STAG2       | stromal antigen 2                                                      | 4.48  | 3.29  |

|                      |                                                 |                                                                       |       |        |
|----------------------|-------------------------------------------------|-----------------------------------------------------------------------|-------|--------|
| <b>MAPK</b>          | ADRB2                                           | adrenergic, beta-2-, receptor, surface                                | 19.67 | 20.56  |
|                      | DUSP9                                           | dual specificity phosphatase 9                                        | 11.39 | 15.37  |
|                      | MAP2K7                                          | mitogen-activated protein kinase kinase 7                             | 7.41  | 8.93   |
|                      | PPP2CA                                          | protein phosphatase 2 (formerly 2A), catalytic subunit, alpha isoform | 3.89  | 4.03   |
| <b>Metastasis</b>    | MTA1                                            | metastasis associated 1                                               | 9.76  | 10.93  |
|                      | RSRC2                                           | arginine/serine-rich coiled-coil 2                                    | 5.38  | 5.55   |
|                      | UTP20                                           | UTP20, small subunit (SSU) processome component                       | 3.02  | 2.58   |
|                      | CD44                                            | CD44 molecule (Indian blood group)                                    | 2.14  | 2.95   |
|                      | MMP2                                            | matrix metalloproteinase 2                                            | 4.32  | 6.43   |
| MMP3                 | matrix metalloproteinase 3                      | 6.21                                                                  | 3.65  |        |
| <b>Proliferation</b> | FILIP1L                                         | filamin A interacting protein 1-like                                  | 157   | 127.13 |
|                      | SDF-1                                           | stroma derived factor-1                                               | 11.2  | 13.2   |
|                      | CADM1                                           | cell adhesion molecule 1                                              | 28.89 | 25.15  |
|                      | BTG1                                            | B-cell translocation gene 1, anti-proliferative                       | 28.22 | 29.83  |
|                      | ADRB2                                           | adrenergic, beta-2-, receptor, surface                                | 19.67 | 20.56  |
|                      | ADAMTS1                                         | ADAM metalloproteinase with thrombospondin type 1 motif, 1            | 16.24 | 10.2   |
|                      | MAS1                                            | MAS1 oncogene                                                         | 15.41 | 14.33  |
|                      | PURA                                            | purine-rich element binding protein A                                 | 15.28 | 16.15  |
|                      | KRT2                                            | keratin 2                                                             | 15.26 | 16.57  |
|                      | EGFR                                            | epidermal growth factor receptor                                      | 13.6  | 8.87   |
|                      | FGA                                             | fibrinogen alpha chain                                                | 12.23 | 7.3    |
|                      | CDC2L5                                          | cell division cycle 2-like 5                                          | 11.24 | 13.32  |
|                      | TSPAN31                                         | tetraspanin 31                                                        | 10.85 | 10.48  |
|                      | COL4A3                                          | collagen, type IV, alpha 3                                            | 9.88  | 8.43   |
|                      | FURIN                                           | furin                                                                 | 9.56  | 9.21   |
|                      | HCLS1                                           | hematopoietic cell-specific Lyn substrate 1                           | 9.38  | 9.09   |
|                      | SLAMF1                                          | signaling lymphocytic activation molecule family member 1             | 8.45  | 11.43  |
|                      | TNFRSF9                                         | tumor necrosis factor receptor superfamily, member 9                  | 8.11  | 6.8    |
|                      | GAL                                             | galanin prepropeptide                                                 | 7.55  | 8.29   |
|                      | FOXC1                                           | forkhead box C1                                                       | 7.5   | 6.58   |
|                      | BCL6                                            | B-cell CLL/lymphoma 6                                                 | 7.1   | 3.88   |
|                      | CUL3                                            | cullin 3                                                              | 5.56  | 6.5    |
|                      | RSRC2                                           | arginine/serine-rich coiled-coil 2                                    | 5.38  | 5.55   |
|                      | NDP                                             | Norrie disease                                                        | 5.02  | 5.58   |
|                      | RPS27                                           | ribosomal protein S27                                                 | 4.86  | 6.76   |
|                      | KIF2C                                           | kinesin family member 2C                                              | 3.93  | 4.33   |
|                      | CSK                                             | c-src tyrosine kinase                                                 | 3.75  | 2.79   |
|                      | HHEX                                            | hematopoietically expressed homeobox                                  | 3.66  | 3.5    |
|                      | CUL1                                            | cullin 1                                                              | 3.61  | 3.55   |
|                      | TOB1                                            | transducer of ERBB2, 1                                                | 3.36  | 3.04   |
|                      | PTPN6                                           | protein tyrosine phosphatase, non-receptor type 6                     | 3.36  | 2.25   |
|                      | S100A6                                          | S100 calcium binding protein A6                                       | 3.34  | 3.8    |
|                      | KLF4                                            | Kruppel-like factor 4 (gut)                                           | 3.17  | 3.45   |
|                      | NCK1                                            | NCK adaptor protein 1                                                 | 3.11  | 7.44   |
| UTP20                | UTP20, small subunit (SSU) processome component | 3.02                                                                  | 2.58  |        |
| MAGED1               | melanoma antigen family D, 1                    | 2.98                                                                  | 2.78  |        |
| IFITM1               | interferon induced transmembrane protein 1      | 2.93                                                                  | 4.23  |        |
| ACVR2A               | activin A receptor, type IIA                    | 2.63                                                                  | 3.21  |        |
| CGRRF1               | cell growth regulator with ring finger domain 1 | 2.63                                                                  | 2.03  |        |
| E2F1                 | E2F transcription factor 1                      | 2.57                                                                  | 2.51  |        |

---

|                       |         |                                                                                      |       |       |
|-----------------------|---------|--------------------------------------------------------------------------------------|-------|-------|
| <b>Wnt</b>            | DKK1    | dickkopf homolog 1                                                                   | 10.2  | 8.19  |
|                       | CSNK1A1 | casein kinase 1, alpha 1                                                             | 9.19  | 11.27 |
|                       | NLK     | nemo-like kinase                                                                     | 8.41  | 7.32  |
|                       | CSNK1G1 | casein kinase 1, gamma 1                                                             | 7.88  | 8.49  |
|                       | PPP2CA  | protein phosphatase 2, catalytic subunit, alpha isoform                              | 3.89  | 4.03  |
|                       | CSNK1A1 | casein kinase 1, alpha 1                                                             | 3.81  | 3.26  |
|                       | HHEX    | hematopoietically expressed homeobox                                                 | 3.66  | 3.5   |
|                       | CELSR2  | cadherin, EGF LAGseven-pass G-type receptor 2                                        | 2.16  | 2.95  |
|                       | TLE1    | transducin-like enhancer of split 1                                                  | 2.13  | 2.41  |
| <b>Focal adhesion</b> | VIM     | vimentin                                                                             | 518.7 | 589.7 |
|                       | TLN1    | talin 1                                                                              | 12.62 | 13.29 |
|                       | SMARCA1 | SWI/SNF related, matrix associated, actin dependent regulator of chromatin, member 1 | 11.41 | 12.02 |
|                       | MMP14   | matrix metalloproteinase 14                                                          | 8.32  | 6.75  |
|                       | CAV2    | caveolin 2                                                                           | 2.21  | 2.46  |

---
